# Supplementary material for: Baseline Gut Microbiota Composition Is Associated With Schistosoma mansoni Infection Burden in Rodent Models
Source: Front Immunol. 2020 Nov 18;11:593838. doi: 10.3389/fimmu.2020.593838 (PMC7718013; doi:10.3389/fimmu.2020.593838)
Supplement: Supplementary file 3 [file Table_3.xlsx]

## Sheet: A) LEfSe
Supplementary Table 3 (A): Microbial taxa showing significant differences in abundance between the gut microbiota of wild type (WT) and human microbiota-associated (HMA) mice uninfected and infected by Schistosoma mansoni based on Linear discriminant analysis Efect Size (LEfSe). The strength of the association with infected or uninfected animals is indicated by color intensity according to the LD…
Phylum	Class	Order	Family	Genus	WT	HMA		LDA score (log10)	Sm-	Sm+
Firmicutes	Clostridia							3-3,5
		Clostridiales						3,5-4
			Lachnospiraceae					4-4,5
				Moryella				>4,5
				Roseburia
				Lachnoclostridium
				Hungatella
				Lachnospiraceae FCS020 group
				GCA-900066575
				Anaerostipes
				Shuttleworthia
				Eubacterium ventriosum group
				Lachnospiraceae UCG-006
				Lachnospiraceae UCG-010
				Eubacterium xylanophilum group
			Ruminococcaceae
				Eubacterium coprostanoligenes group
				Anaerotruncus
				Negativibacillus
				Flavonifractor
				Oscillibacter
				Ruminococcaceae UCG-004
				Ruminococcus 1
				Fournierella
				Intestinimonas
				Ruminococcaceae UCG-009
				Ruminococcaceae NK4A214 group
			Peptococcaceae
			Clostridiaceae 1
				Clostridium sensu stricto 1
				Candidatus Arthromitus
			Family XIII
				Family XIII AD3011 group
				Family XIII UCG-001
			Clostridiales vadinBB60 group
	Negativicutes
		Selenomonadales
			Acidaminococcaceae
				Phascolarctobacterium
	Erysipelotrichia	Erysipelotrichales	Erysipelotrichaceae	Turicibacter
				Clostridium innocuum group
	Bacilli
		Bacillales
Bacteroidetes	Bacteroidia
		Bacteroidales
			Tannerellaceae
				Parabacteroides
			Barnesiellaceae
				Barnesiella
				Coprobacter
			Marinifilaceae
				Butyricimonas
				Odoribacter
			Rikenellaceae	Rikenella
				Alistipes
			Bacteroidaceae	Bacteroides
			Muribaculaceae
Proteobacteria	Gammaproteobacteria
		Betaproteobacteriales
			Burkholderiaceae
				Parasutterella
	Alphaproteobacteria
		Rhodospirillales
			Uncultured	Azospirillum sp. 47 25
	Deltaproteobacteria	Desulfovibrionales	Desulfovibrionaceae
Cyanobacteria
	Melainabacteria
		Gastranaerophilales

## Sheet: B) ANOVA_WT
Supplementary Table 3 (B): Microbial taxa showing significant differences in abundance between the gut microbiota of wild type (WT) mice uninfected and infected by Schistosoma mansoni.
Taxa		p-value	Fold Changea
Class	Alphaproteobacteria	0.025	6.84
Order	Rhodospirillales	0.025	6.84
Family	Rikenellaceae	0.002	1.15
	Bacteroidaceae	0.012	1.08
	Peptococcaceae	0.015	-1.10
	Uncultured	0.029	7.62
	Clostridiaceae 1	0.042	4.67
Genus	Bacteroides	0.0007	1.11
	Alistipes	0.001	1.27
	Lachnospiraceae UCG-006	0.002	-2.70
	Ruminococcaceae UCG-009	0.016	-1.30
	Anaerotruncus	0.017	-1.20
	Ruminococcaceae NK4A214 group	0.021	6.02
	Lachnospiraceae FCS020 group	0.021	1.13
	Family XIII UCG-001	0.022	-1.60
	Azospirillum sp.47 25	0.024	8.23
	Lachnospiraceae UCG-010	0.027	-4.20
	Marvinbryantia	0.028	-2.10
	Candidatus Arthromitus	0.029	5.91
	Uncultured organism	0.035	-1.70
	Eubacterium xylanophilum group	0.036	-1.20
	Ruminiclostridium	0.039	-1.20
	Ruminococcus 1	0.045	-2.20
aFold change > 0 = overrepresented in infected (Sm+) vs.uninfected (Sm-); Fold change < 0 = uninfected (Sm-) vs. infected (Sm+)

## Sheet: C) ANOVA_HMA
Supplementary Table 3 (C): Microbial taxa showing significant differences in abundance between the gut microbiota of human microbiota-associated (HMA) mice uninfected and infected by Schistosoma mansoni.
Taxa		p-value	Fold Changea
Phylum	Cyanobacteria	0.004	-8.80
	Proteobacteria	0.011	-1.40
	Bacteroidetes	0.024	-1.20
	Firmicutes	0.040	-1.20
Class	Bacilli	0.001	-3.50
	Melainabacteria	0.003	-9.10
	Alphaproteobacteria	0.005	-2.10
	Deltaproteobacteria	0.009	-2.30
	Erysipelotrichia	0.017	-1.30
Order	Gastranaerophilales	0.002	-10.0
	Desulfovibrionales	0.004	-2.40
	Rhodospirillales	0.006	-2.00
	Erysipelotrichales	0.008	-1.30
	Bacillales	0.019	-3.20
	DTU014	0.022	-2.60
	Betaproteobacteriales	0.038	-1.20
Family	Clostridiaceae 1	0.000000002	-23.00
	Uncultured	0.021	-1.80
	Desulfovibrionaceae	0.023	-2.00
Genus	Shuttleworthia	0.00000000001	-Inf
	Turicibacter	0.0000000002	-Inf
	Ruminococcus 1	0.000000004	-Inf
	Clostridium sensu stricto 1	0.000000005	-23.00
	Hungatella	0.000005	1.33
	Clostridium innocuum group	0.002	1.80
	Fournierella	0.004	-7.00
	Intestinimonas	0.005	-2.20
	Lachnoclostridium	0.008	1.13
	Family XIII AD3011 group	0.008	-3.10
	Moryella	0.012	1.88
	Eubacterium ventriosum group	0.012	-2.10
	Eubacterium coprostanoligenes group	0.014	Inf
	Roseburia	0.016	1.20
	Azospirillum sp. 47 25	0.023	-1.90
	Anaerostipes	0.024	1.17
	Parabacteroides	0.027	1.05
	Butyricimonas	0.028	1.26
	GCA-900066575	0.032	1.16
	Lachnospiraceae UCG-010	0.044	-2.10
aFold change > 0 = overrepresented in infected (Sm+) vs.uninfected (Sm-); Fold change < 0 = overrepresented in uninfected (Sm-) vs. infected (Sm+). Inf/-Inf = undetected taxa in uninfected/infected mice
